# Supplementary material for: Unveiling the reconstructed active phase of Ni3Se2model for water splitting
Source: Royal Society of Chemistry journal article supplement (doi:10.1039/d2nj04475g), 2022-12-02
Supplement: d2nj04475g1.pdf [file d2nj04475g1.pdf]

**Supporting Information**  
**Unveiling the reconstructed active phase of Ni<sub>3</sub>Se<sub>2</sub>**  
**model for water splitting**

Hao Yang Lin,<sup>a</sup> Genning Yang<sup>b</sup> and Peng Fei Liu<sup>\*a</sup>

<sup>a</sup> Key Laboratory for Ultrafine Materials of Ministry of Education, Shanghai Engineering Research Center of Hierarchical Nanomaterials, School of Materials Science and Engineering, East China University of Science and Technology, 130 Meilong Road, Shanghai 200237

<sup>b</sup> Shaoyun Middle School affiliated to University of Shanghai for Science and Technology, 1980 Huangxing Road, Shanghai 200093, China

\*Corresponding author: [pfliu@ecust.edu.cn](mailto:pfliu@ecust.edu.cn) (P. F. L).

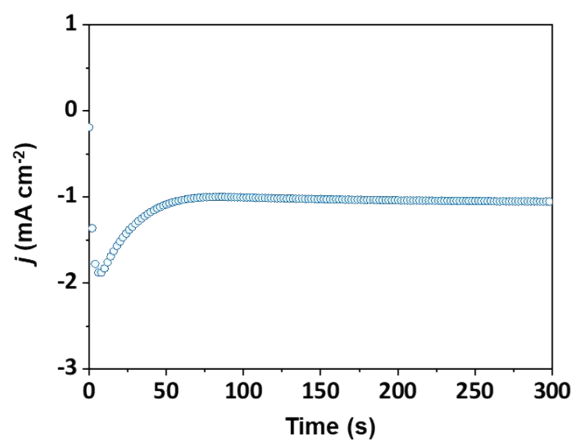

**Figure S1.** The corresponding electrodeposition chronoamperometric curve for preparing the sample of Ni<sub>3</sub>Se<sub>2</sub>/FTO.

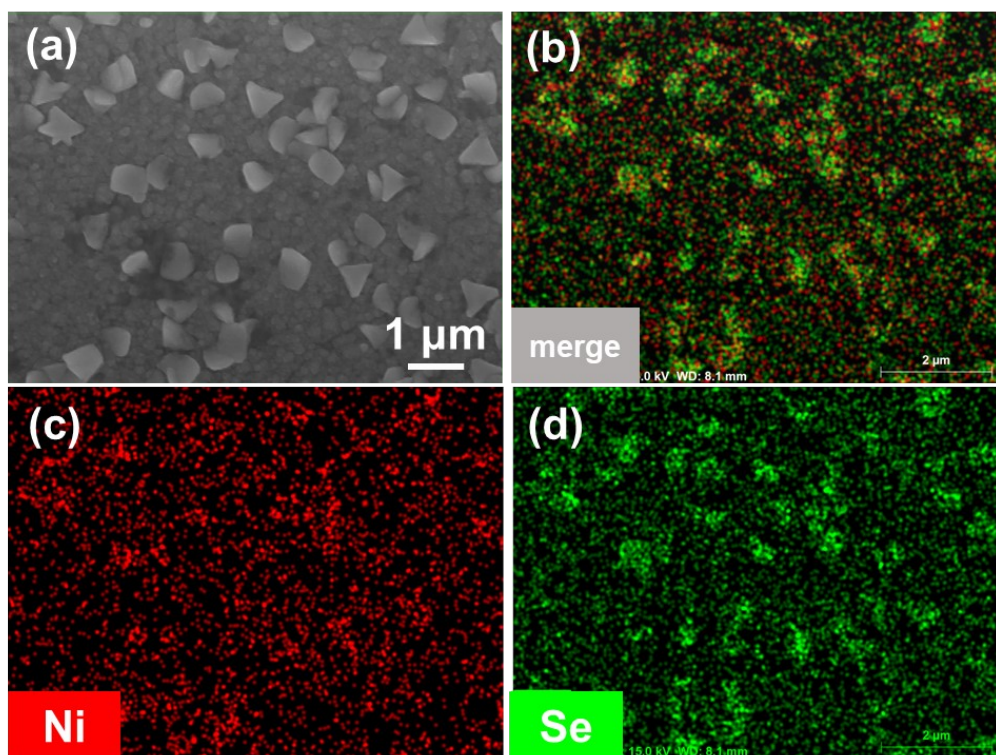

**Figure S2.** SEM images and EDS profiles of pristine  $\text{Ni}_3\text{Se}_2/\text{FTO}$ .

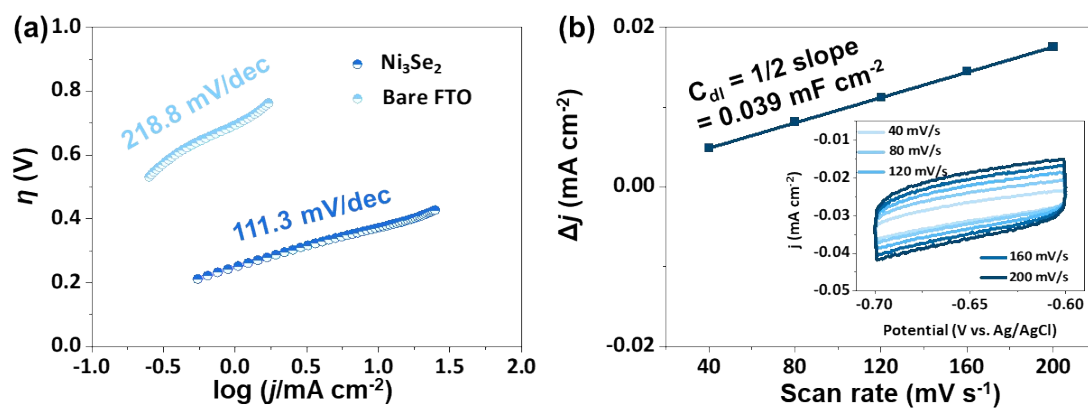

**Figure S3.** (a) Tafel plots derived from HER LSV curves of  $\text{Ni}_3\text{Se}_2/\text{FTO}$  and blank FTO substrate in 1.0 M KOH. (b) Scan rate dependence of the current densities ( $\Delta j = j_a - j_c$ ) for  $\text{Ni}_3\text{Se}_2/\text{FTO}$  at -0.65 V vs Ag/AgCl.

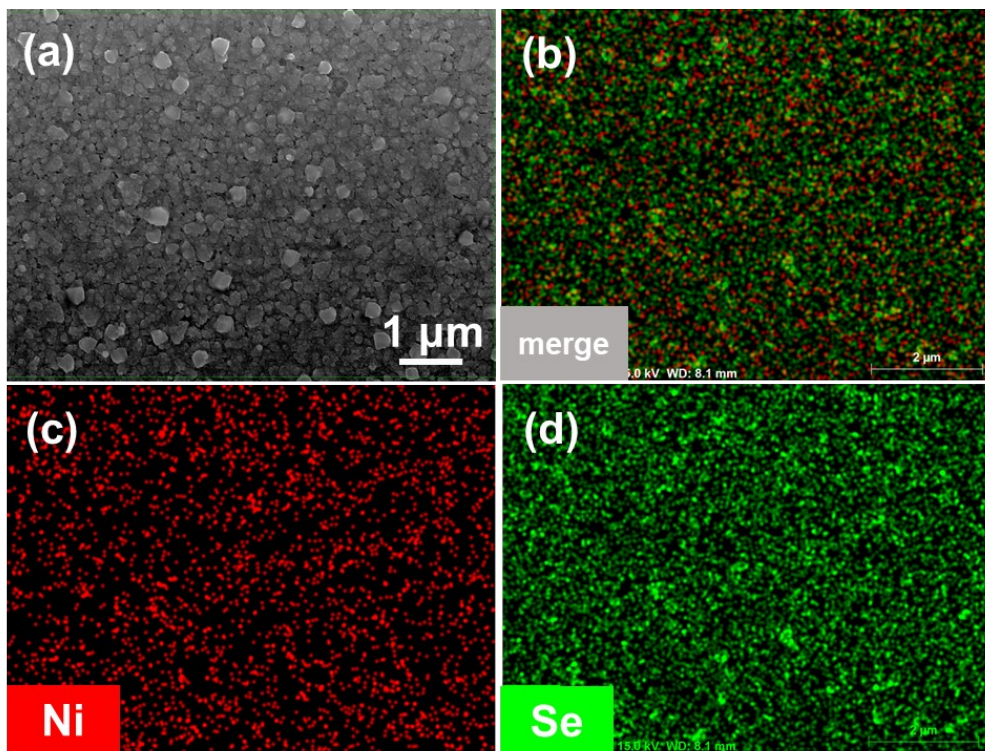

**Figure S4.** SEM images and EDS profiles of  $\text{Ni}_3\text{Se}_2/\text{FTO}$  after HER stability test.

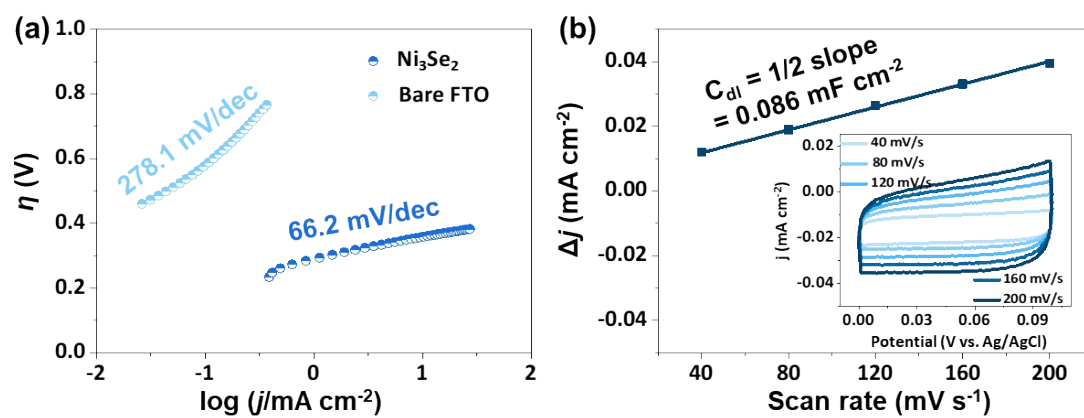

**Figure S5.** (a) Tafel plots derived from OER LSV curves for the samples of  $\text{Ni}_3\text{Se}_2/\text{FTO}$  and blank FTO substrate in 1.0 M KOH. (b) Scan rate dependence of the current densities ( $\Delta j = j_a - j_c$ ) for  $\text{Ni}_3\text{Se}_2/\text{FTO}$  at 0.05 V vs Ag/AgCl.

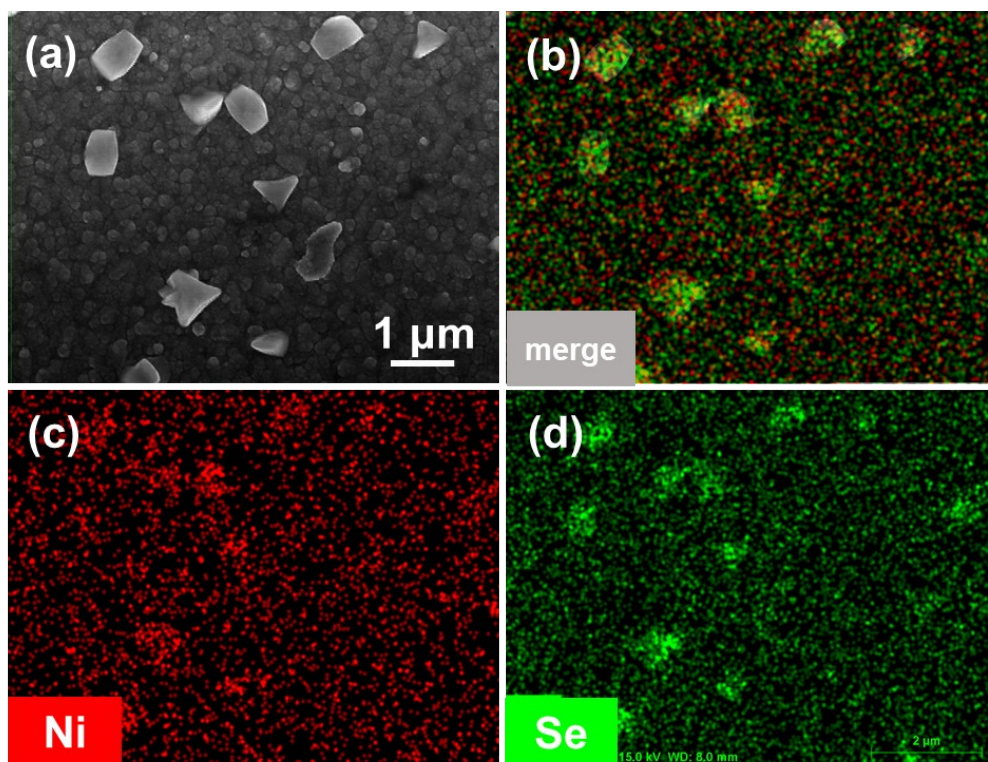

**Figure S6.** SEM images and EDS profiles of  $\text{Ni}_3\text{Se}_2/\text{FTO}$  after OER stability test.

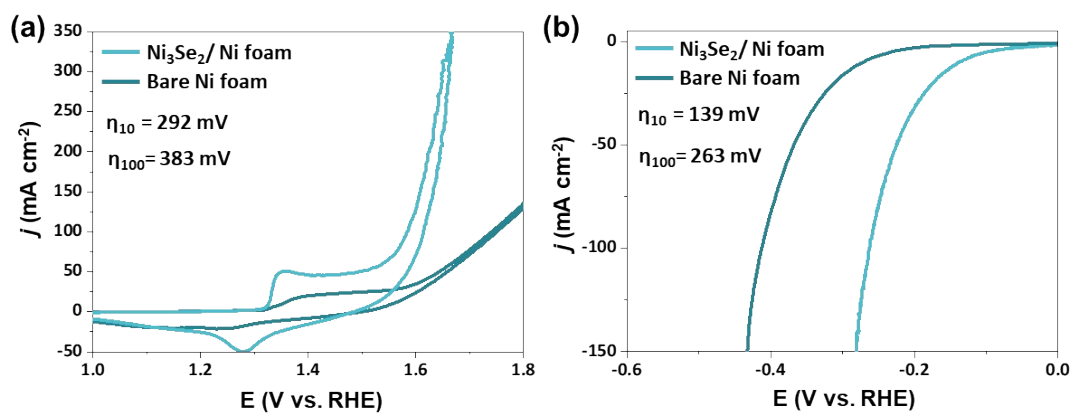

**Figure S7.** (a) Cyclic voltammetry (CV) curves toward OER for  $\text{Ni}_3\text{Se}_2/\text{Ni}$  foam and bare Ni foam. Considering the intense redox peak of Ni species, we show the CV curves rather than linear sweep voltammetry (LSV) curves. (b) LSV curves towards HER for  $\text{Ni}_3\text{Se}_2/\text{Ni}$  foam and bare Ni foam.
